# Supplementary material for: Acid–base bifunctional HPA nanocatalysts promoting heterogeneous transesterification and esterification reactions
Source: Royal Society of Chemistry journal article supplement (doi:10.1039/c3cy20868k), 2013-01-01
Supplement: c3cy20868k.pdf [file c3cy20868k.pdf]

# Supporting information

## **Acid-base bifunctional HPA nanocatalysts promoting heterogeneous transesterification and esterification reactions**

<sup>a</sup> Key Lab of Polyoxometalate Science of Ministry of Education, Faculty of Chemistry, Northeast Normal University, Changchun 130024, P. R. China. Fax: 0086-431-85099759; Tel.: 0086-431-88930042; E-mail address: wangxh665@nenu.edu.cn

<sup>b</sup> Changchun Institute of Applied Chemistry, Chinese Academy of Sciences, Changchun 130022, P. R. China. Tel.: 0086-431- 85262452; E-mail address: [jzj2002@sohu.com](mailto:jzj2002@sohu.com)

## **Experimental**

The Hammett acid strength was measured by exposing samples of ly<sub>2</sub>HPW (0.1g) to benzene solutions of a known amount of selected Hammett indicators (methyl violet, pK<sub>a</sub> = +0.8; anthraquinone, pK<sub>a</sub> = -8.2; 2,4,6-trinitroaniline, pK<sub>a</sub> = -10.1; p-nitrotoluene, pK<sub>a</sub> = -11.35; p-nitrochlorobenzene, pK<sub>a</sub> = -12.7; 2,4- dinitrotoluene, pK<sub>a</sub> = -13.75; 2,4-dinitrofluorobenzene, pK<sub>a</sub> = -14.52). UV-Vis spectra of the air dried samples were recorded to quantify the amount of indicator adsorbed on the surface of the catalyst. And the Hammett base strength was also determined in the same method, which was measured by exposing samples of catalysts (0.1g) to benzene solutions of a known amount of selected Hammett indicators (bromothymol blue, pK<sub>a</sub> = 7.2; phenolphthalein, pK<sub>a</sub> = 9.3; 2,4,6-Trinitrobenzene amine, pK<sub>a</sub> = 12.2; 2,4-dinitraniline, pK<sub>a</sub> = 15.0; 4-chloride-2-nitroaniline, pK<sub>a</sub> = 17.2).

The acid capacity of (C<sub>6</sub>H<sub>15</sub>O<sub>2</sub>N<sub>2</sub>)<sub>2</sub>HPW<sub>12</sub>O<sub>40</sub> and H<sub>3</sub>PW<sub>12</sub>O<sub>40</sub> was measured by titration. A sample of catalyst (0.1g) was stirred with 2M NaCl (20 mL). After 24 h, Filter to remove the solid, the filtrate was measured by titration with NaOH (0.05 M). The indicator was phenolphthalein.<sup>1-2</sup>

1 D. E. Lopez, K. Suwannakarn, D. A. Bruce, J. G. Goodwin Jr. , J. Catal. 2007, 247, 43 –50.

2 A. A. Kiss, A. C. Dimian, G. Rothenberg, Adv. Synth. Catal. 2006, 348, 75–81.

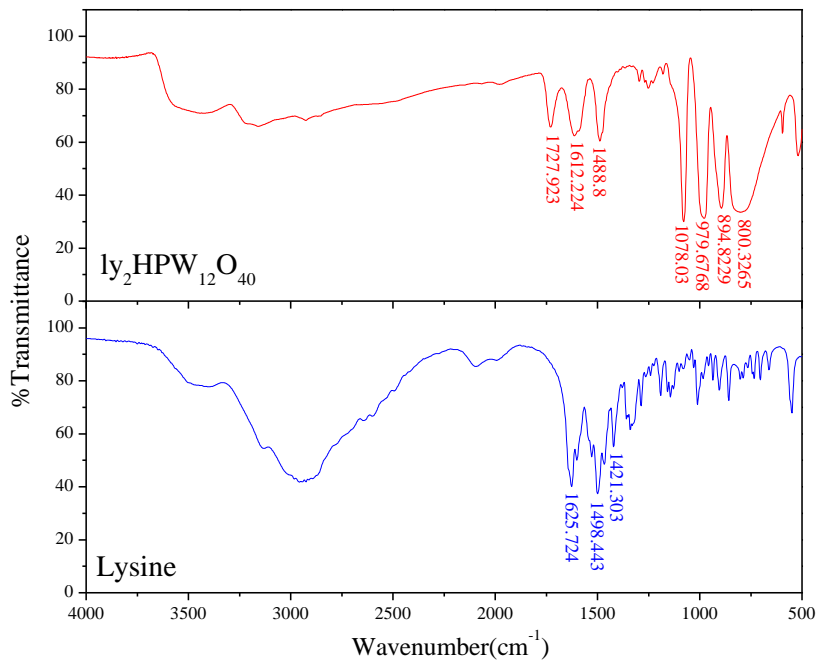

**Fig S1** The IR spectra of  $ly_2HPW_{12}O_{40}$  and lysine

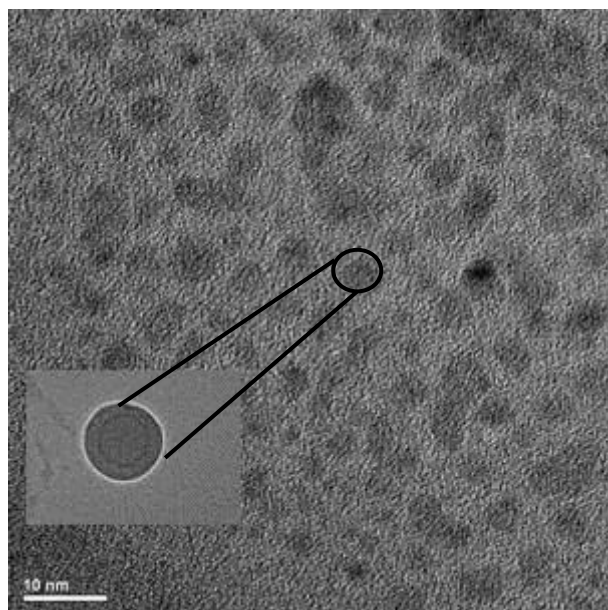

**Fig. S2** The TEM image of  $(\text{C}_6\text{H}_{15}\text{O}_2\text{N}_2)_2\text{HPW}_{12}\text{O}_{40}$

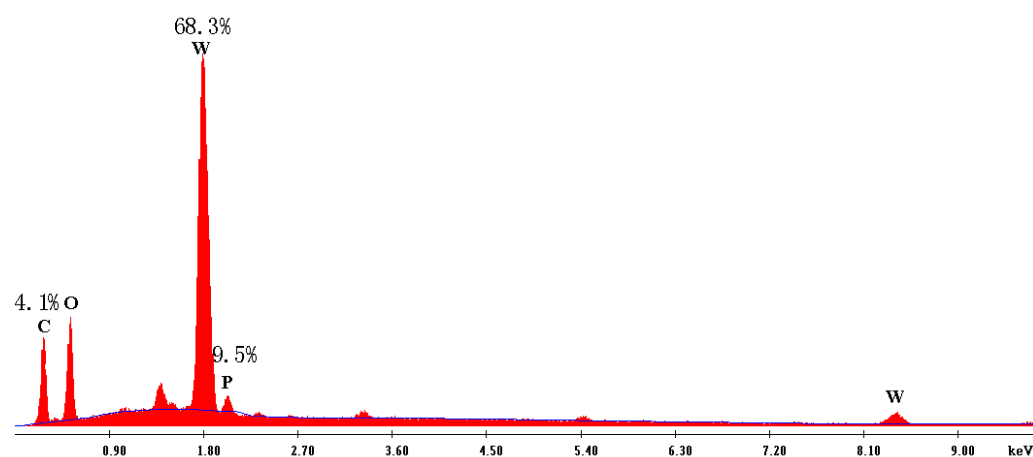

**Fig. S3** The Energy dispersive X-ray spectroscopic data of  $(\text{C}_6\text{H}_{15}\text{O}_2\text{N}_2)_2\text{HPW}_{12}\text{O}_{40}$

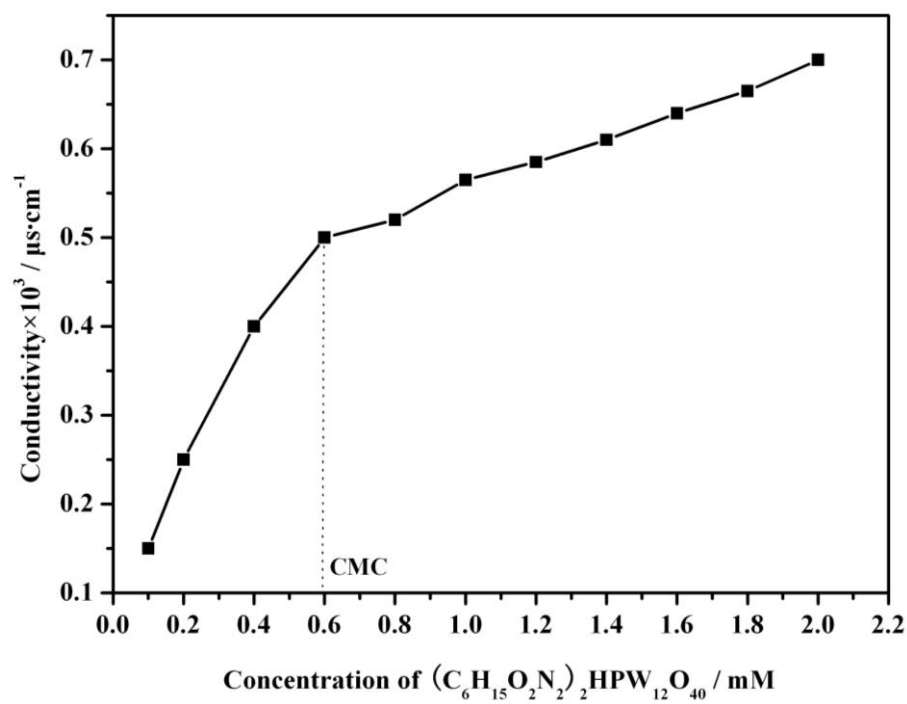

**Fig. S4** The CMC of ly<sub>2</sub>HPW in room temperature

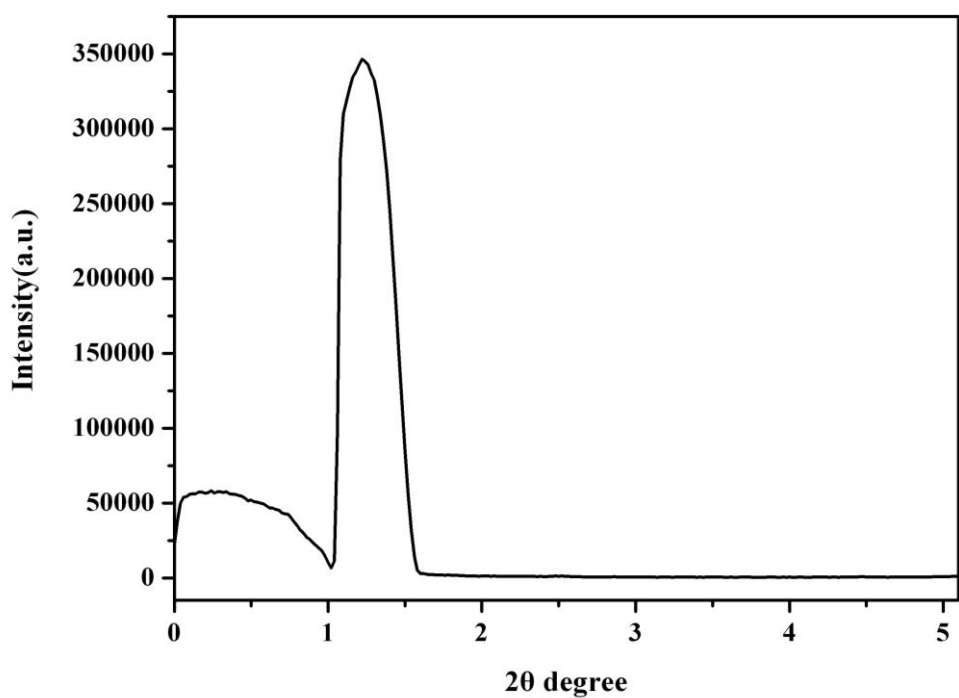

**Fig. S5** Low-angle XRD pattern of ly<sub>2</sub>HPW

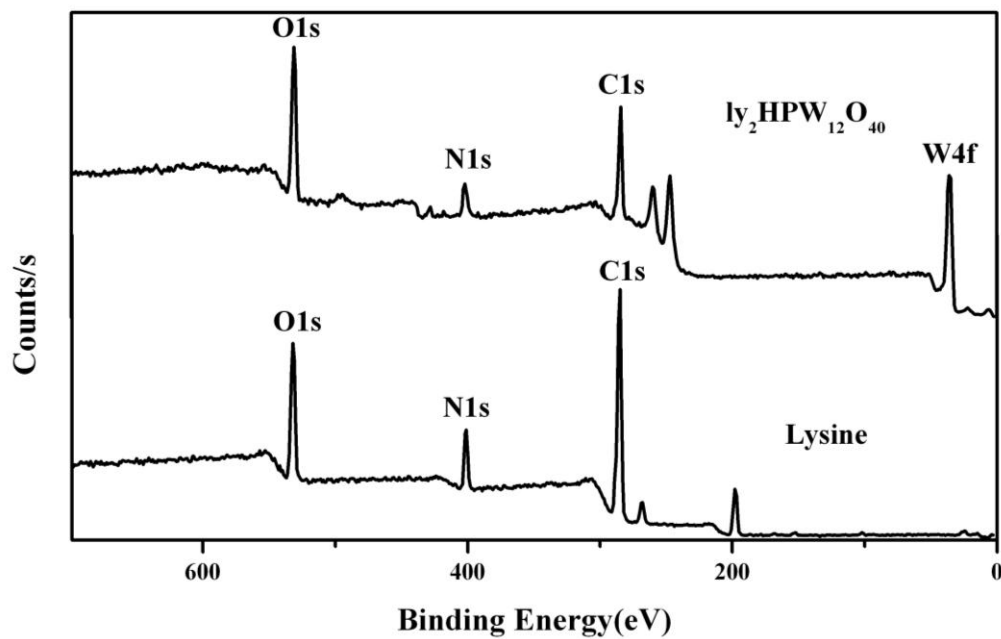

**Fig. S6** Binding energy of  $\text{ly}_2\text{HPW}$  and lysine

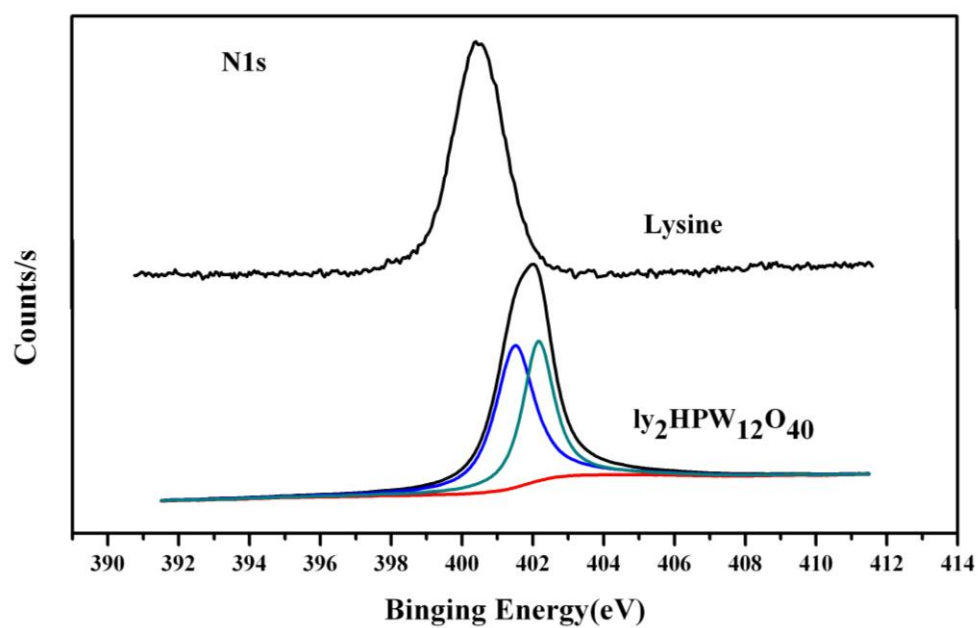

**Fig. S7a** The XPS of lysine and ly<sub>2</sub>HPW<sub>12</sub>O<sub>40</sub> for N1s

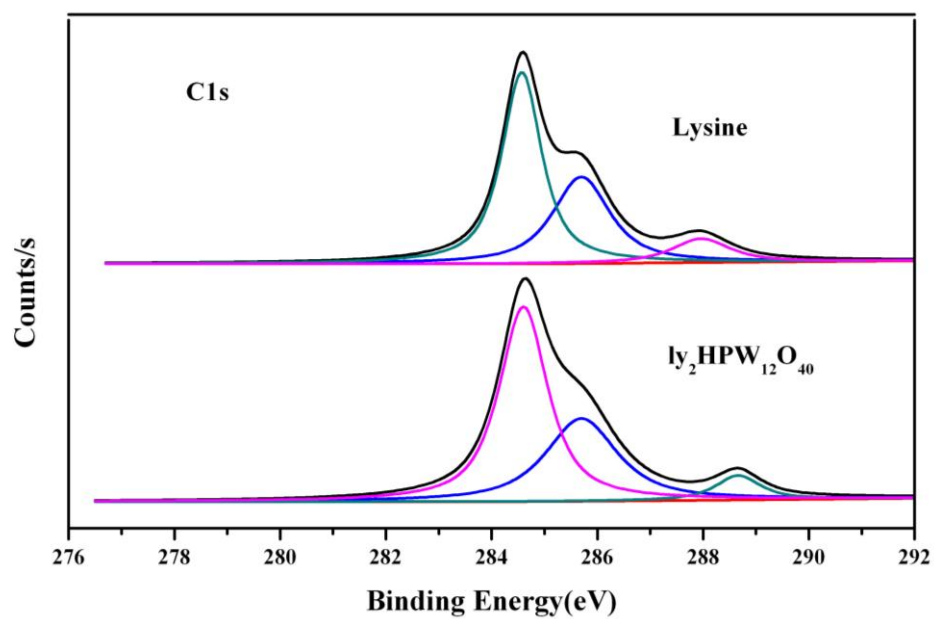

**Fig. S7b** The XPS of lysine and ly<sub>2</sub>HPW for C1s



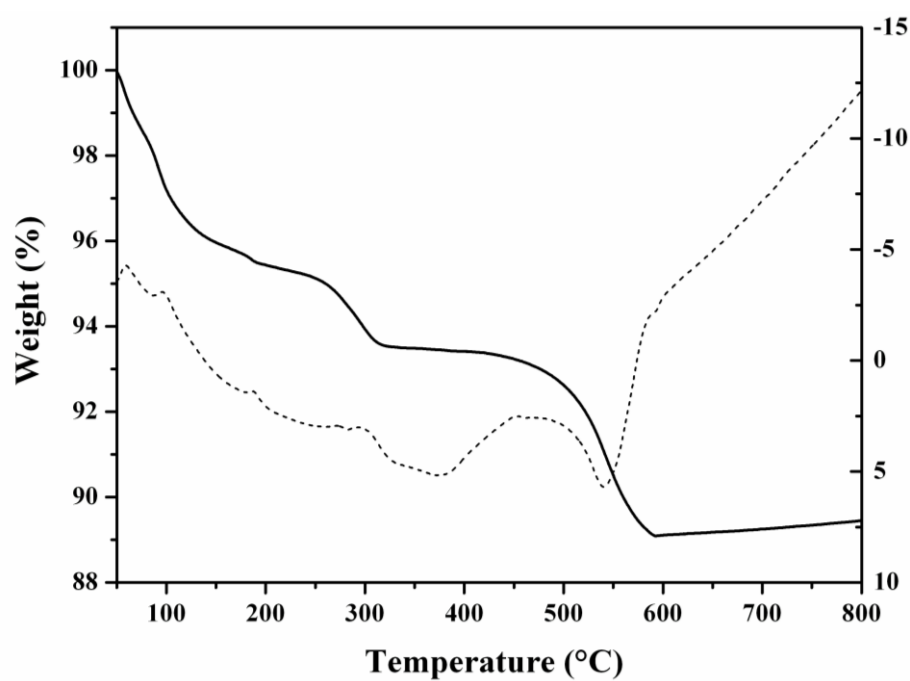

**Fig. S8** The thermal analysis (TGA/DTA) curves of ly<sub>2</sub>HPW

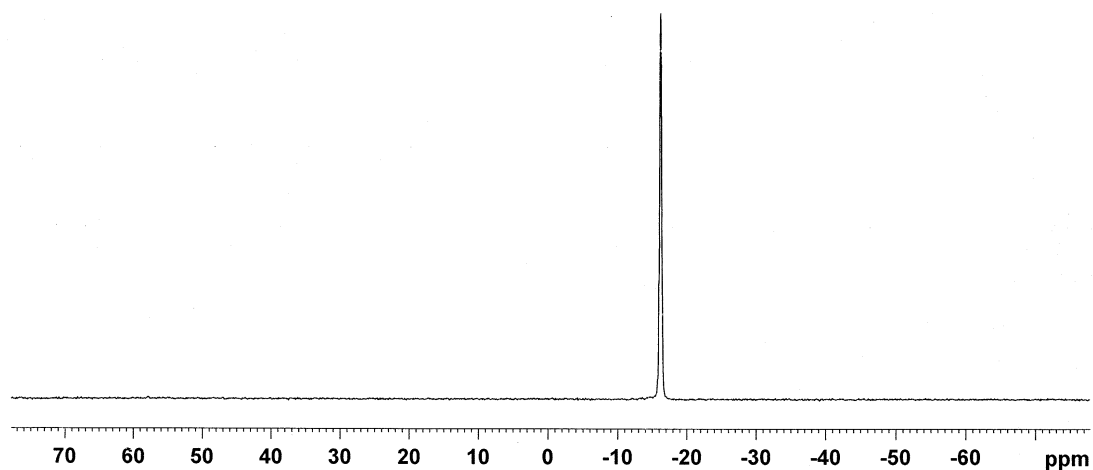

(a)

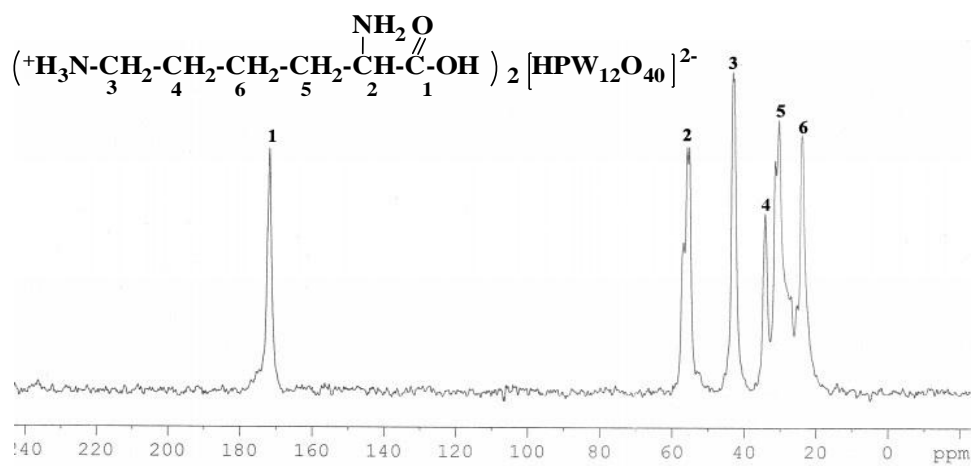

(b)

**Fig. S9** The MAS NMR of  $\text{ly}_2\text{HPW}$  (a)  $^{31}\text{P}$  MAS NMR; (b)  $^{13}\text{C}$  MAS NMR

**Table S1** The surface composition of ly2HPW in XPS

| Element | At. % | Atom ratio |
|---------|-------|------------|
| C       | 10.92 | 12.13      |
| P       | 0.9   | 1          |
| N       | 3.85  | 4.27       |
| W       | 11.2  | 12.44      |
| O       | 41.3  | 45.88      |
